# Supplementary material
Source: ML conference proceedings conference paper supplement (https://proceedings.neurips.cc/paper_files/paper/2022/hash/6a5181cfe76f67b37a7e1bb19837abdf-Abstract.html)
Supplement: Supplementary file 1 [file 6a5181cfe76f67b37a7e1bb19837abdf-Supplemental-Conference.zip]

Archive with 55 entries (51 files):
- supplementary/
- supplementary/mfl-main/
- __MACOSX/supplementary/._mfl-main
- supplementary/appendix.pdf
- __MACOSX/supplementary/._appendix.pdf
- supplementary/mfl-main/LICENSE
- __MACOSX/supplementary/mfl-main/._LICENSE
- supplementary/mfl-main/models.py
- __MACOSX/supplementary/mfl-main/._models.py
- supplementary/mfl-main/reprogramming/
- __MACOSX/supplementary/mfl-main/._reprogramming
- supplementary/mfl-main/mfl_code.zip
- __MACOSX/supplementary/mfl-main/._mfl_code.zip
- supplementary/mfl-main/fig1_concept.ipynb
- __MACOSX/supplementary/mfl-main/._fig1_concept.ipynb
- supplementary/mfl-main/fig1_batch/
- __MACOSX/supplementary/mfl-main/._fig1_batch
- supplementary/mfl-main/README.md
- __MACOSX/supplementary/mfl-main/._README.md
- supplementary/mfl-main/fig3_growth.ipynb
- __MACOSX/supplementary/mfl-main/._fig3_growth.ipynb
- supplementary/mfl-main/.gitignore
- __MACOSX/supplementary/mfl-main/._.gitignore
- supplementary/mfl-main/appendix_annealing.ipynb
- __MACOSX/supplementary/mfl-main/._appendix_annealing.ipynb
- supplementary/mfl-main/reprogramming/data_repr.h5ad
- __MACOSX/supplementary/mfl-main/reprogramming/._data_repr.h5ad
- supplementary/mfl-main/reprogramming/viz.ipynb
- __MACOSX/supplementary/mfl-main/reprogramming/._viz.ipynb
- supplementary/mfl-main/reprogramming/run-gwot.sh
- __MACOSX/supplementary/mfl-main/reprogramming/._run-gwot.sh
- supplementary/mfl-main/reprogramming/run.sh
- __MACOSX/supplementary/mfl-main/reprogramming/._run.sh
- supplementary/mfl-main/reprogramming/gen.sh
- __MACOSX/supplementary/mfl-main/reprogramming/._gen.sh
- supplementary/mfl-main/reprogramming/.gitattributes
- __MACOSX/supplementary/mfl-main/reprogramming/._.gitattributes
- supplementary/mfl-main/reprogramming/gen-gwot.sh
- __MACOSX/supplementary/mfl-main/reprogramming/._gen-gwot.sh
- supplementary/mfl-main/reprogramming/main.py
- __MACOSX/supplementary/mfl-main/reprogramming/._main.py
- supplementary/mfl-main/fig1_batch/viz.ipynb
- __MACOSX/supplementary/mfl-main/fig1_batch/._viz.ipynb
- supplementary/mfl-main/fig1_batch/run-gwot.sh
- __MACOSX/supplementary/mfl-main/fig1_batch/._run-gwot.sh
- supplementary/mfl-main/fig1_batch/run.sh
- __MACOSX/supplementary/mfl-main/fig1_batch/._run.sh
- supplementary/mfl-main/fig1_batch/gen.sh
- __MACOSX/supplementary/mfl-main/fig1_batch/._gen.sh
- supplementary/mfl-main/fig1_batch/model_fig1.py
- __MACOSX/supplementary/mfl-main/fig1_batch/._model_fig1.py
- supplementary/mfl-main/fig1_batch/gen-gwot.sh
- __MACOSX/supplementary/mfl-main/fig1_batch/._gen-gwot.sh
- supplementary/mfl-main/fig1_batch/main.py
- __MACOSX/supplementary/mfl-main/fig1_batch/._main.py
