# Supplementary material
Source: ML conference proceedings conference paper supplement (https://proceedings.neurips.cc/paper_files/paper/2022/hash/6a5181cfe76f67b37a7e1bb19837abdf-Abstract.html)
Supplement: Supplementary file 1 [file 6a5181cfe76f67b37a7e1bb19837abdf-Supplemental-Conference.zip › supplementary/mfl-main/fig1_batch/viz.ipynb]

# %% [code]
import os
num_threads = "16"
os.environ["OMP_NUM_THREADS"] = num_threads
os.environ["OPENBLAS_NUM_THREADS"] = num_threads
os.environ["MKL_NUM_THREADS"] = num_threads
os.environ["VECLIB_MAXIMUM_THREADS"] = num_threads
os.environ["NUMEXPR_NUM_THREADS"] = num_threads

# %% [code]
import matplotlib.pyplot as plt
import torch
from torch.autograd import grad, Variable
import autograd
import autograd.numpy as np
import copy
import scipy as sp
from scipy import stats
from sklearn import metrics
import sys
import ot
import gwot
from gwot import models, sim, ts, util
import gwot.bridgesampling as bs
import dcor
from tqdm import tqdm

sys.path.append("..")
import importlib
import models
import random
import model_fig1 as model_sim
import mmd

# %% [code]
PLT_CELL = 2.5

# %% [code]
import glob

fnames_all = glob.glob("out_N_*.npy")
fnames_all_gwot = glob.glob("out_gwot_N_*.npy")

# %% [code]
srand_all = np.array([int(f.split("_")[4]) for f in fnames_all])
srand_all_gwot = np.array([int(f.split("_")[5]) for f in fnames_all_gwot])

# %% [code]
lamda_all = np.array([float(f.split("_")[6].split(".npy")[0]) for f in fnames_all])
lamda_all_gwot = np.array([float(f.split("_")[7].split(".npy")[0]) for f in fnames_all_gwot])

# %% [code]
N_all = np.array([int(f.split("_")[2]) for f in fnames_all])
N_all_gwot = np.array([int(f.split("_")[3]) for f in fnames_all_gwot])

# %% [code]
x_all = [np.load(f, allow_pickle = True).item(0)["x"] for f in fnames_all]
x_gwot_all = [np.load(f, allow_pickle = True).item(0)["samples_gwot"] for f in fnames_all_gwot]

# %% [code]
# setup simulation object
sim = gwot.sim.Simulation(V = model_sim.Psi, dV = model_sim.dPsi, birth_death = False, 
                          N = None,
                          T = model_sim.T, 
                          d = model_sim.dim, 
                          D = model_sim.D, 
                          t_final = model_sim.t_final, 
                          ic_func = model_sim.ic_func, 
                          pool = None)

sim_gt = copy.deepcopy(sim)
sim_gt.N = np.array([1_000, ]*model_sim.T)
sim_gt.sample(steps_scale = int(model_sim.sim_steps/sim.T));

# %% [code]
plt.scatter(np.linspace(0, model_sim.t_final, model_sim.T)[sim_gt.t_idx], sim_gt.x[:, 0], alpha = 0.01, color = "blue")

# %% [code]
x_all[0].shape

# %% [code]
with torch.no_grad():
    d_reconstruct = np.array([[dcor.energy_distance(sim_gt.x[sim_gt.t_idx == i, :], x_all[j][i, :]) for i in range(x_all[j].shape[0])] for j in tqdm(range(len(x_all)), position = 0, leave = True)])
d_gwot = np.array([[dcor.energy_distance(sim_gt.x[sim_gt.t_idx == i, :], x_gwot_all[j][i, :]) for i in range(x_gwot_all[j].shape[0])] for j in tqdm(range(len(x_gwot_all)), position = 0, leave = True)])

# %% [code]
plt.plot(d_gwot[(N_all_gwot == 1) & (lamda_all_gwot == 0.005), :].mean(0), 'o-', label = "gWOT")
plt.plot(d_reconstruct[(N_all == 1) & (lamda_all == 0.05), :].mean(0), 'o-', label = "Langevin")
plt.legend()

# %% [code]
fnames_all[0]

# %% [code]
N_vals, _ = np.unique(N_all, return_index = True)
N_vals_gwot, _ = np.unique(N_all_gwot, return_index = True)
lamda_vals, _ = np.unique(lamda_all, return_index = True)
lamda_vals_gwot, _ = np.unique(lamda_all_gwot, return_index = True)
srand_vals, _ = np.unique(srand_all, return_index = True)
srand_vals_gwot, _ = np.unique(srand_all_gwot, return_index = True)

# %% [code]
d_reconstruct_tensor = np.full((len(N_vals), len(lamda_vals), len(srand_vals), sim_gt.T), float("NaN"))
for (_N, _lamda, _srand) in zip(N_all, lamda_all, srand_all):
    d_reconstruct_tensor[N_vals == _N, lamda_vals == _lamda, srand_vals == _srand, :] = d_reconstruct[(N_all == _N) & (lamda_all == _lamda) & (srand_all == _srand), :].flatten()

d_gwot_tensor = np.full((len(N_vals_gwot), len(lamda_vals_gwot), len(srand_vals_gwot), sim_gt.T), float("NaN"))
for (_N, _lamda, _srand) in zip(N_all_gwot, lamda_all_gwot, srand_all_gwot):
    d_gwot_tensor[N_vals_gwot == _N, lamda_vals_gwot == _lamda, srand_vals_gwot == _srand, :] = d_gwot[(N_all_gwot == _N) & (lamda_all_gwot == _lamda) & (srand_all_gwot == _srand), :].flatten()

# %% [code]
plt.subplot(1, 2, 1)
plt.plot(lamda_vals, np.sqrt(d_reconstruct_tensor[0].mean(-1)).mean(-1), 'o-')
plt.title("Langevin")
plt.subplot(1, 2, 2)
plt.plot(lamda_vals_gwot, np.sqrt(d_gwot_tensor[0].mean(-1)).mean(-1), 'o-')
plt.title("gWOT")

# %% [code]
plt.figure(figsize = (3*PLT_CELL, 3/2*PLT_CELL))
plt.subplot(1, 2, 1)
# im = plt.imshow(np.nanmean(d_reconstruct_tensor, (2, 3)), origin = "lower")
im = plt.imshow(np.sqrt(d_reconstruct_tensor.mean(-1)).mean(-1), origin = "lower")
plt.xticks(range(len(lamda_vals)), lamda_vals, rotation = 30)
plt.yticks(range(len(N_vals)), N_vals)
plt.colorbar(im,fraction=0.038, pad=0.04)
plt.xlabel("$\lambda$")
plt.ylabel("N")
plt.title("Langevin")

plt.subplot(1, 2, 2)
# im = plt.imshow(np.nanmean(d_gwot_tensor, (2, 3)), origin = "lower")
im = plt.imshow(np.sqrt(d_gwot_tensor.mean(-1)).mean(-1), origin = "lower")
plt.xticks(range(len(lamda_vals_gwot)), lamda_vals_gwot, rotation = 30)
plt.yticks(range(len(N_vals_gwot)), N_vals_gwot)
plt.colorbar(im,fraction=0.038, pad=0.04)
plt.xlabel("$\lambda$")
plt.ylabel("N")
plt.title("gWOT")

plt.tight_layout()

# %% [code]
np.sqrt(d_reconstruct_tensor.mean(-1)).mean(-1)

# %% [code]
plt.plot(lamda_vals, np.sqrt(d_reconstruct_tensor.mean(-1)).mean(-1).T, 'o-');

# %% [code]
plt.subplot(1, 2, 1)
plt.plot(N_vals, np.sqrt(d_reconstruct_tensor.mean(-1)).mean(-1), 'o-', label = "Langevin");
plt.ylim(0, 0.5)
plt.legend()
plt.xscale("log")
plt.subplot(1, 2, 2)
plt.plot(N_vals, np.sqrt(d_gwot_tensor.mean(-1)).mean(-1), 'o-', label = "gWOT");
plt.ylim(0, 0.5)
plt.legend()
plt.xscale("log")

# %% [code]
means

# %% [code]
plt.figure(figsize = (PLT_CELL, 1.75*PLT_CELL))

sds = np.std(np.sqrt(d_reconstruct_tensor.mean(-1)), axis = 2)
means = np.sqrt(d_reconstruct_tensor.mean(-1)).mean(-1)
min_idx = np.nanargmin(means, axis = 1)
sds_minmean = np.array([x[y] for (x, y) in zip(sds, min_idx)])
plt.errorbar(N_vals, np.nanmin(means, 1), sds_minmean, label = "MFL", color = "blue", marker = "o")

sds = np.std(np.sqrt(d_gwot_tensor.mean(-1)), axis = 2)
means = np.sqrt(d_gwot_tensor.mean(-1)).mean(-1)
min_idx = np.nanargmin(means, axis = 1)
sds_minmean = np.array([x[y] for (x, y) in zip(sds, min_idx)])
plt.errorbar(N_vals, np.nanmin(means, 1), sds_minmean, label = "gWOT", color = "red", marker = "o")

plt.ylabel("RMS Energy Distance")
plt.xlabel("N")

plt.xscale("log")
plt.legend()

plt.tight_layout()
plt.savefig("../fig1_distances.pdf")

# %% [code]
