# Supplementary material
Source: ML conference proceedings conference paper supplement (https://proceedings.neurips.cc/paper_files/paper/2022/hash/6a5181cfe76f67b37a7e1bb19837abdf-Abstract.html)
Supplement: Supplementary file 1 [file 6a5181cfe76f67b37a7e1bb19837abdf-Supplemental-Conference.zip › supplementary/mfl-main/fig1_concept.ipynb]

# %% [code]
import os
num_threads = "8"
os.environ["OMP_NUM_THREADS"] = num_threads
os.environ["OPENBLAS_NUM_THREADS"] = num_threads
os.environ["MKL_NUM_THREADS"] = num_threads
os.environ["VECLIB_MAXIMUM_THREADS"] = num_threads
os.environ["NUMEXPR_NUM_THREADS"] = num_threads

# %% [code]
import matplotlib.pyplot as plt
import torch
from torch.autograd import grad, Variable
import autograd
import autograd.numpy as np
import copy
import scipy as sp
from scipy import stats
from sklearn import metrics
import sys
import ot
import gwot
from gwot import models, sim, ts, util
import gwot.bridgesampling as bs
import dcor

sys.path.append("fig1_batch")
import importlib
import models
import random
import model_fig1 as model_sim

# %% [code]
importlib.reload(model_sim)

# %% [code]
device = torch.device("cuda:0" if torch.cuda.is_available() else "cpu")
torch.set_default_dtype(torch.float64)

# %% [code]
PLT_CELL = 2.5

# %% [code]
# set random seed
SRAND = 0
torch.manual_seed(SRAND)
np.random.seed(SRAND)

# %% [code]
M = 100
N_vals = [64, 1]
N0 = 64

# setup simulation object
sims_all = [gwot.sim.Simulation(V = model_sim.Psi, dV = model_sim.dPsi, birth_death = False, 
                          N = np.array([N0, ] + [N, ]*(model_sim.T-2) + [N0, ]),
                          T = model_sim.T, 
                          d = model_sim.dim, 
                          D = model_sim.D, 
                          t_final = model_sim.t_final, 
                          ic_func = model_sim.ic_func, 
                          pool = None) for N in N_vals]

# sample from simulation
for s in sims_all:
    s.sample(steps_scale = int(model_sim.sim_steps/s.T));

# %% [code]
sim_gt = copy.deepcopy(sims_all[0])
sim_gt.N = np.array([500, ]*model_sim.T)
sim_gt.sample(steps_scale = int(model_sim.sim_steps/sims_all[0].T));

# %% [code]
# plot samples
i = 0
plt.scatter(sims_all[i].x[:, 0], sims_all[i].x[:, 1], alpha = 0.25, c = sims_all[i].t_idx)

# %% [code]
plt.scatter(sim_gt.x[:, 0], sim_gt.x[:, 1], alpha = 0.25, c = sim_gt.t_idx)

# %% [code]
k = 0
plt.subplot(1, 2, 1)
plt.scatter(np.linspace(0, model_sim.t_final, model_sim.T)[sims_all[-1].t_idx], sims_all[-1].x[:, k], alpha = 0.5, color = "red")
plt.ylim(-2.0, 2.0)
plt.subplot(1, 2, 2)
plt.scatter(np.linspace(0, model_sim.t_final, model_sim.T)[sim_gt.t_idx], sim_gt.x[:, k], alpha = 0.01, color = "blue")
plt.ylim(-2.0, 2.0)

# %% [code]
importlib.reload(models)
importlib.reload(model_sim)
torch.set_num_threads(8)

# %% [code]
models_all = [models.TrajLoss(torch.randn(model_sim.T, M, model_sim.dim)*0.1,
                        torch.tensor(s.x, device = device), 
                        torch.tensor(s.t_idx, device = device), 
                        dt = model_sim.t_final/model_sim.T, tau = model_sim.D, sigma = None, M = M,
                        lamda_reg = 0.05, lamda_cst = 0, sigma_cst = float("Inf"),
                        branching_rate_fn = model_sim.branching_rate,
                        sinkhorn_iters = 250, device = device, warm_start = True) for s in sims_all]

# %% [code]
outputs_all = [models.optimize(m, n_iter = 2_500, eta_final = 0.1, tau_final = model_sim.D, sigma_final = 0.5, N = M, temp_init = 1.0, temp_ratio = 1.0, dim = model_sim.dim, tloss = m, print_interval = 50) for m in models_all]

# %% [code]
plt.plot(outputs_all[0][1])

# %% [code]
plt.plot(np.vstack([o[1] for o in outputs_all]).T)
plt.title("Objective: primal")

# %% [code]
u = np.full(model_sim.dim, 1); u[2:] = 0
u = u/np.linalg.norm(u)

# %% [code]
i = -1
with torch.no_grad():
    plt.scatter(np.kron(np.linspace(0, model_sim.t_final, model_sim.T), np.ones(M)), models_all[i].x.reshape(-1, model_sim.dim)[:, 0], c = np.kron(np.arange(model_sim.T), np.ones(M)), alpha = 0.1)
# plt.scatter(np.linspace(0, t_final, T)[simodel_sim.t_idx], np.dot(simodel_sim.x, u), alpha = 0.5, color = "red", marker = "x")

# %% [code]
i = 0
plt.scatter(sims_all[i].x[:, 0], sims_all[i].x[:, 1], color = "red", marker = "x")
with torch.no_grad():
    plt.scatter(models_all[i].x.reshape(-1, model_sim.dim)[:, 0], models_all[i].x.reshape(-1, model_sim.dim)[:, 1], c = np.kron(np.arange(model_sim.T), np.ones(M)), alpha = 0.25)
plt.axis('auto')

# %% [code]
models_all_gwot = [gwot.models.OTModel(s, lamda_reg = 0.0025,
          eps_df = 0.01*torch.ones(s.T), 
          growth_constraint="exact", 
          pi_0 = "uniform",
          use_keops = False,
          device = device) for s in sims_all]

for m in models_all_gwot:
    m.solve_lbfgs(steps = 10, 
                    max_iter = 50, 
                    lr = 1,
                    history_size = 50, 
                    line_search_fn = 'strong_wolfe', 
                    factor = 2, 
                    tol = 1e-5, 
                    retry_max = 0);

# %% [code]
X_gwot_samples_all = [np.stack([m.ts.x[np.random.choice(m.ts.x.shape[0], size = M, p = torch.nn.functional.normalize(m.get_R(t).detach(), p = 1.0, dim = 0)), :] for t in range(model_sim.T)]) for m in models_all_gwot]

# %% [code]
N_paths_gt = 250
N_paths = 50
paths_gt = sim_gt.sample_trajectory(steps_scale = int(model_sim.sim_steps/sim_gt.T), N = N_paths_gt)

# %% [code]
from matplotlib.gridspec import GridSpec
fig = plt.figure(figsize = (3*PLT_CELL, 2*PLT_CELL))
gs = GridSpec(2, 3, figure=fig)

for (i, s) in enumerate(sims_all):
    ax = fig.add_subplot(gs[len(models_all)-i-1, 0])
    # plt.scatter(np.linspace(0, t_final, T)[s.t_idx], np.dot(s.x, u), alpha = 0.25, color = "red", marker = ".")
    # plt.plot(np.linspace(0, t_final, paths_gt.shape[1]), np.dot(paths_gt, u).T, color = 'grey', alpha = 0.05);
    ax.plot(paths_gt[:, :, 0].T, paths_gt[:, :, 1].T, color = 'grey', alpha = 0.05);
    # ax.scatter(s.x[:, 0], s.x[:, 1], alpha = 0.5, color = "red", marker = ".")
    ax.scatter(s.x[:, 0], s.x[:, 1], alpha = 0.5, c = s.t_idx/s.T, marker = ".")
    ax.set_ylim(-1.75, 0.5); ax.set_xlim(-2, 2)
    ax.set_xlabel("$x_0$"); ax.set_ylabel("$x_1$")
    # ax.set_title("N = %d" % N_vals[i])
    ax.text(0.75, 0.25, "N = %d" % N_vals[i])
    if i > 0:
        ax.set_title("Samples")
        ax.get_xaxis().set_visible(False)

for (i, m) in enumerate(models_all):
    ax = fig.add_subplot(gs[len(models_all)-i-1, 1])
    with torch.no_grad():
        paths = bs.sample_paths(None, N = N_paths, coord = True, x_all = m.x.cpu().numpy(), 
                            get_gamma_fn = lambda i : m.loss_reg.ot_losses[i].coupling().cpu(), num_couplings = model_sim.T-1)
        # plt.plot(np.linspace(0, t_final, paths.shape[1]), np.dot(paths, u).T, color = 'grey', alpha = 0.1);
        ax.plot(paths[:, :, 0].T, paths[:, :, 1].T, color = 'grey', alpha = 0.25);
        # plt.scatter(np.kron(np.linspace(0, t_final, T), np.ones(M)), np.dot(m.x.reshape(-1, dim), u), c = np.kron(np.arange(T), np.ones(M)), alpha = 0.25, marker = ".")
        im = ax.scatter(m.x.reshape(-1, model_sim.dim)[:, 0], m.x.reshape(-1, model_sim.dim)[:, 1], c = np.kron(np.linspace(0, model_sim.t_final, model_sim.T), np.ones(M)), alpha = 0.25, marker = ".")
    ax.set_xlabel("$x_0$"); ax.set_ylabel("$x_1$")
    ax.set_ylim(-1.75, 0.5); ax.set_xlim(-2, 2)
    # ax.set_title("N = %d" % N_vals[i])
    ax.text(0.75, 0.25, "N = %d" % N_vals[i])
    ax.get_yaxis().set_visible(False)
    if i > 0:
        ax.set_title("MFL")
        ax.get_xaxis().set_visible(False)

for (i, x) in enumerate(X_gwot_samples_all):
    ax = fig.add_subplot(gs[len(models_all)-i-1, 2])
    with torch.no_grad():
        paths = bs.sample_paths(None, N = N_paths, coord = True, x_all = [sims_all[i].x, ]*sims_all[i].T, 
                                get_gamma_fn = lambda j : models_all_gwot[i].get_coupling_reg(j, K = models_all_gwot[i].get_K(j)), num_couplings = sims_all[i].T-1)
        # plt.plot(np.linspace(0, t_final, paths.shape[1]), np.dot(paths, u).T, color = 'grey', alpha = 0.1);
        ax.plot(paths[:, :, 0].T, paths[:, :, 1].T, color = 'grey', alpha = 0.25);
    # plt.scatter(np.kron(np.linspace(0, t_final, T), np.ones(M)), np.dot(x, u), c = np.kron(np.arange(T), np.ones(M)), alpha = 0.25, marker = ".")
    ax.scatter(x.reshape(-1, model_sim.dim)[:, 0], x.reshape(-1, model_sim.dim)[:, 1], c = np.kron(np.arange(model_sim.T), np.ones(M)), alpha = 0.25, marker = ".")
    ax.set_ylim(-1.75, 0.5); ax.set_xlim(-2, 2)
    ax.set_xlabel("$x_0$"); ax.set_ylabel("$x_1$")
    # ax.set_title("N = %d" % N_vals[i])
    ax.text(0.75, 0.25, "N = %d" % N_vals[i])
    ax.get_yaxis().set_visible(False)
    if i > 0:
        ax.set_title("gWOT")
        ax.get_xaxis().set_visible(False)

plt.tight_layout() 
        
fig.subplots_adjust(right=0.9)
cbar_ax = fig.add_axes([0.925, 0.15, 0.025, 0.7])
cb = fig.colorbar(im, cax=cbar_ax)
cb.set_alpha(1)
cb.draw_all()
cbar_ax.set_title("$t$")
 
plt.savefig("fig1_langevin_new.pdf")

# %% [code]
N_paths = 50
plt.figure(figsize = (3*PLT_CELL, 1.25*PLT_CELL))
for (i, m) in enumerate(models_all):
    plt.subplot(1, len(N_vals), i+1)
    with torch.no_grad():
        paths = bs.sample_paths(None, N = N_paths, coord = True, x_all = m.x.cpu().numpy(), 
                            get_gamma_fn = lambda i : m.loss_reg.ot_losses[i].coupling().cpu(), num_couplings = model_sim.T-1)
        # plt.plot(np.linspace(0, t_final, paths.shape[1]), np.dot(paths, u).T, color = 'grey', alpha = 0.1);
        plt.plot(paths[:, :, 0].T, paths[:, :, 1].T, color = 'grey', alpha = 0.25);
        # plt.scatter(np.kron(np.linspace(0, t_final, T), np.ones(M)), np.dot(m.x.reshape(-1, dim), u), c = np.kron(np.arange(T), np.ones(M)), alpha = 0.25, marker = ".")
        plt.scatter(m.x.reshape(-1, model_sim.dim)[:, 0], m.x.reshape(-1, model_sim.dim)[:, 1], c = np.kron(np.arange(model_sim.T), np.ones(M)), alpha = 0.25, marker = ".")
    plt.xlabel("x"); plt.ylabel("y")
    plt.ylim(-1.75, 0.5); plt.xlim(-2, 2)
    plt.title("N = %d" % N_vals[i])
    if i > 0:
        plt.gca().get_yaxis().set_visible(False)
plt.suptitle("Langevin")
plt.tight_layout()
plt.savefig("fig1_langevin.pdf")

# %% [code]
plt.figure(figsize = (3*PLT_CELL, 1.25*PLT_CELL))
for (i, x) in enumerate(X_gwot_samples_all):
    plt.subplot(1, len(N_vals), i+1)
    with torch.no_grad():
        paths = bs.sample_paths(None, N = N_paths, coord = True, x_all = [sims_all[i].x, ]*sims_all[i].T, 
                                get_gamma_fn = lambda j : models_all_gwot[i].get_coupling_reg(j, K = models_all_gwot[i].get_K(j)), num_couplings = sims_all[i].T-1)
        # plt.plot(np.linspace(0, t_final, paths.shape[1]), np.dot(paths, u).T, color = 'grey', alpha = 0.1);
        plt.plot(paths[:, :, 0].T, paths[:, :, 1].T, color = 'grey', alpha = 0.25);
    # plt.scatter(np.kron(np.linspace(0, t_final, T), np.ones(M)), np.dot(x, u), c = np.kron(np.arange(T), np.ones(M)), alpha = 0.25, marker = ".")
    plt.scatter(x.reshape(-1, model_sim.dim)[:, 0], x.reshape(-1, model_sim.dim)[:, 1], c = np.kron(np.arange(model_sim.T), np.ones(M)), alpha = 0.25, marker = ".")
    plt.ylim(-1.75, 0.5); plt.xlim(-2, 2)
    plt.xlabel("x"); plt.ylabel("y")
    if i > 0:
        plt.gca().get_yaxis().set_visible(False)
    plt.title("N = %d" % N_vals[i])
plt.suptitle("gWOT")
plt.tight_layout()
plt.savefig("fig1_gwot.pdf")

# %% [code]
plt.figure(figsize = (3*PLT_CELL, 1.25*PLT_CELL))
for (i, s) in enumerate(sims_all):
    plt.subplot(1, len(N_vals), i+1)
    # plt.scatter(np.linspace(0, t_final, T)[s.t_idx], np.dot(s.x, u), alpha = 0.25, color = "red", marker = ".")
    # plt.plot(np.linspace(0, t_final, paths_gt.shape[1]), np.dot(paths_gt, u).T, color = 'grey', alpha = 0.05);
    plt.plot(paths_gt[:, :, 0].T, paths_gt[:, :, 1].T, color = 'grey', alpha = 0.05);
    plt.scatter(s.x[:, 0], s.x[:, 1], alpha = 0.5, color = "red", marker = ".")
    plt.ylim(-1.75, 0.5); plt.xlim(-2, 2)
    if i > 0:
        plt.gca().get_yaxis().set_visible(False)
    plt.xlabel("x"); plt.ylabel("y")
    plt.title("N = %d" % N_vals[i])
plt.suptitle("Samples")
plt.tight_layout()
plt.savefig("fig1_samples.pdf")

# %% [code]
plt.figure(figsize = (3*PLT_CELL, PLT_CELL))
i = 1

plt.subplot(1, 4, 1)
plt.plot(paths_gt[:, :, 0].T, paths_gt[:, :, 1].T, color = 'grey', alpha = 0.05);
plt.scatter(sim_gt.x[:, 0], sim_gt.x[:, 1], alpha = 0.025, color = "blue", marker = ".")
plt.ylim(-1.75, 0.5); plt.xlim(-2, 2)
plt.xlabel("x"); plt.ylabel("y")
plt.title("Ground truth")

plt.subplot(1, 4, 2)
plt.plot(paths_gt[:, :, 0].T, paths_gt[:, :, 1].T, color = 'grey', alpha = 0.05);
plt.scatter(sims_all[i].x[:, 0], sims_all[i].x[:, 1], alpha = 0.5, color = "red", marker = ".")
plt.ylim(-1.75, 0.5); plt.xlim(-2, 2)
plt.xlabel("x")
plt.title("Samples")
plt.gca().get_yaxis().set_visible(False)

plt.subplot(1, 4, 3)
with torch.no_grad():
    paths = bs.sample_paths(None, N = N_paths, coord = True, x_all = m.x.cpu().numpy(), 
                        get_gamma_fn = lambda i : m.loss_reg.ot_losses[i].coupling().cpu(), num_couplings = model_sim.T-1)
    # plt.plot(np.linspace(0, t_final, paths.shape[1]), np.dot(paths, u).T, color = 'grey', alpha = 0.1);
    plt.plot(paths[:, :, 0].T, paths[:, :, 1].T, color = 'grey', alpha = 0.25);
    # plt.scatter(np.kron(np.linspace(0, t_final, T), np.ones(M)), np.dot(m.x.reshape(-1, dim), u), c = np.kron(np.arange(T), np.ones(M)), alpha = 0.25, marker = ".")
    plt.scatter(m.x.reshape(-1, model_sim.dim)[:, 0], m.x.reshape(-1, model_sim.dim)[:, 1], c = np.kron(np.arange(model_sim.T), np.ones(M)), alpha = 0.25, marker = ".")
plt.xlabel("x")
plt.ylim(-1.75, 0.5); plt.xlim(-2, 2)
plt.title("Reconstruction")
plt.gca().get_yaxis().set_visible(False)

plt.tight_layout()

# plt.subplot(1, 4, 4)
# with torch.no_grad():
#     paths = bs.sample_paths(None, N = N_paths, coord = True, x_all = [sims_all[i].x, ]*sims_all[i].T, 
#                             get_gamma_fn = lambda j : models_all_gwot[i].get_coupling_reg(j, K = models_all_gwot[i].get_K(j)), num_couplings = sims_all[i].T-1)
#     # plt.plot(np.linspace(0, t_final, paths.shape[1]), np.dot(paths, u).T, color = 'grey', alpha = 0.1);
#     plt.plot(paths[:, :, 0].T, paths[:, :, 1].T, color = 'grey', alpha = 0.25);
# # plt.scatter(np.kron(np.linspace(0, t_final, T), np.ones(M)), np.dot(x, u), c = np.kron(np.arange(T), np.ones(M)), alpha = 0.25, marker = ".")
# plt.scatter(x.reshape(-1, model_sim.dim)[:, 0], x.reshape(-1, model_sim.dim)[:, 1], c = np.kron(np.arange(model_sim.T), np.ones(M)), alpha = 0.25, marker = ".")
# plt.ylim(-1.75, 0.5); plt.xlim(-2, 2)
# plt.gca().get_yaxis().set_visible(False)

# %% [code]
fig = plt.figure(figsize = (3.5*PLT_CELL, 1*PLT_CELL))
for (i, j) in enumerate(np.array([1, 50, 500, 2500])-1):
    plt.subplot(1, 4, i+1)
    # plt.scatter(np.kron(np.linspace(0, t_final, T), np.ones(M)), np.dot(outputs_all[0][2][j, :, :, :].reshape(-1, dim), u), c = np.kron(np.arange(T), np.ones(M)), alpha = 0.1, marker = '.')
    im = plt.scatter(outputs_all[0][2][j, :, :, :].reshape(-1, model_sim.dim)[:, 0], outputs_all[0][2][j, :, :, :].reshape(-1, model_sim.dim)[:, 1], c = np.kron(np.linspace(0, model_sim.t_final, model_sim.T), np.ones(M)), alpha = 0.25, marker = ".")
    plt.ylim(-1.75, 0.5); plt.xlim(-2, 2)
    # plt.text(-1.75, -1.65, "Iter %d" % (j+1))
    plt.title("Iter %d" % (j+1))
    plt.xlabel("x")
    plt.ylabel("y")
    # if i // 4 == 0:
    #     plt.gca().get_xaxis().set_visible(False)
    if i % 4 > 0:
        plt.gca().get_yaxis().set_visible(False)
plt.tight_layout()

fig.subplots_adjust(right=0.9)
cbar_ax = fig.add_axes([0.925, 0.15, 0.025, 0.7])
cb = fig.colorbar(im, cax=cbar_ax)
cb.set_alpha(1)
cb.draw_all()
cbar_ax.set_title("$t$")

plt.savefig("fig2_trainingdynamics.pdf")

# %% [code]
plt.figure(figsize = (PLT_CELL, PLT_CELL))
plt.plot(outputs_all[0][1], 'k')
plt.title("Reduced objective $F$")
plt.xlabel("Iteration")
plt.ylabel("$F$")
plt.tight_layout()
plt.ylim(2.25, 3.0)
plt.savefig("fig2_objective.pdf")
