# Supplementary material
Source: ML conference proceedings conference paper supplement (https://proceedings.neurips.cc/paper_files/paper/2022/hash/6a5181cfe76f67b37a7e1bb19837abdf-Abstract.html)
Supplement: Supplementary file 1 [file 6a5181cfe76f67b37a7e1bb19837abdf-Supplemental-Conference.zip › supplementary/mfl-main/fig3_growth.ipynb]

# %% [code]
import matplotlib.pyplot as plt
import torch
from torch.autograd import grad, Variable
import autograd
import autograd.numpy as np
import copy
import scipy as sp
from scipy import stats
from sklearn import metrics
import sys
import ot
import gwot
from gwot import models, sim, ts, util
import gwot.bridgesampling as bs

import models
import random

# %% [code]
device = torch.device("cuda:0" if torch.cuda.is_available() else "cpu")
torch.set_default_dtype(torch.float64)
torch.set_num_threads(16)

# %% [code]
PLT_CELL = 2.5

# %% [code]
# set random seed
SRAND = 0
torch.manual_seed(SRAND)
np.random.seed(SRAND)
# setup simulation parameters
dim = 10 # dimension of simulation
sim_steps = 250 # number of steps to use for Euler-Maruyama method
T = 10 # number of timepoints
D = 1.0 # diffusivity
t_final = 0.5 # simulation run on [0, t_final]
N = 50

# %% [code]
# setup potential function
def Psi(x, t, dim = dim):
    x0 = 1.4*np.array([1, 1] + [0, ]*(dim - 2))
    x1 = -1.25*np.array([1, 1] + [0, ]*(dim - 2))
    return 1.25*np.sum((x - x0)*(x - x0), axis = -1) * np.sum((x - x1)*(x - x1), axis = -1) + 10*np.sum(x[:, 2:]*x[:, 2:], axis = -1)
# get gradient 
dPsi = autograd.elementwise_grad(Psi)

# %% [code]
# branching rates
R = 10
beta = lambda x, t: R*((np.tanh(2*x[0]) + 1)/2)
delta = lambda x, t: 0
r = lambda x, t: beta(x, t) - delta(x, t)

# %% [code]
# function for particle initialisation
ic_func = lambda N, d: np.random.randn(N, d)*0.1

# setup simulation object
sim = gwot.sim.Simulation(V = Psi, dV = dPsi, birth_death = True, 
                          birth = beta,
                          death = delta,
                          N = np.repeat(N, T),
                          T = T, 
                          d = dim, 
                          D = D, 
                          t_final = t_final, 
                          ic_func = ic_func, 
                          pool = None)

# sample from simulation
sim.sample(steps_scale = int(sim_steps/sim.T), trunc = N);

# %% [code]
plt.scatter(np.kron(np.linspace(0, t_final, T), np.ones(N)), sim.x[:, 0], alpha = 0.1, color = "red")
plt.xlabel("t"); plt.ylabel("dim 1")

# %% [code]
X_obs = torch.tensor(sim.x, device = device) 
t_idx_obs = torch.tensor(sim.t_idx, device = device)

M = 100
X0 = torch.randn(T, M, dim)*0.1
R_func = lambda x: R*((torch.tanh(2*x[:, 0]) + 1)/2)

# %% [code]
normalize = lambda x: x/x.sum()

# %% [code]
model = models.TrajLoss(X0.clone(), X_obs, t_idx_obs, dt = t_final/T, tau = D, 
                        sigma = None, M = M, lamda_reg = 0.025, lamda_cst = 0, sigma_cst = float("Inf"), 
                        branching_rate_fn = R_func,
                        sinkhorn_iters = 250, device = device, warm_start = True, 
                        lamda_unbal = None)
# model.w[0] *= 2
# model.w[-1] *= 2
# model.w = normalize(model.w)

# %% [code]
output = models.optimize(model, n_iter = 2_500, eta_final = 0.1, tau_final = D, sigma_final = 0.5, temp_init = 1.0, temp_ratio = 1.0, N = M, dim = dim, tloss = model, print_interval = 50);
# output2 = models.optimize(model, n_iter = 250, tau_final = 0.5, sigma_final = np.sqrt(D), eta_final = 0.5, temp_range = (1, 1), N = M, dim = dim, tloss = model, print_interval = 50);

# %% [code]
R_func_null = lambda x: 0*((torch.tanh(2*x[:, 0]) + 1)/2)
model_null = models.TrajLoss(X0.clone(), X_obs, t_idx_obs, dt = t_final/T, tau = D, 
                        sigma = None, M = M, lamda_reg = 0.025, lamda_cst = 0, sigma_cst = float("Inf"), 
                        branching_rate_fn = R_func_null,
                        sinkhorn_iters = 250, device = device, warm_start = True, 
                        lamda_unbal = None)

# model_null.w[0] *= 2
# model_null.w[-1] *= 2
# model_null.w = normalize(model_null.w)

# %% [code]
output_null = models.optimize(model_null, n_iter = 2_500, eta_final = 0.1, tau_final = D, sigma_final = 0.5, temp_init = 1.0, temp_ratio = 1.0, N = M, dim = dim, tloss = model, print_interval = 50);
# output2_null = models.optimize(model_null, n_iter = 250, tau_final = 0.5, sigma_final = np.sqrt(D), eta_final = 0.5, temp_range = (1, 1), N = M, dim = dim, tloss = model, print_interval = 50);

# %% [code]
# model_unbal = models.TrajLoss(X0.clone(), X_obs, t_idx_obs, dt = t_final/T, sigma2 = D, 
#                         eta = None, M = M, lamda = 0.025, lamda_cst = 0, eta_cst = 5, 
#                         branching_rate = R_func,
#                         n_sinkhorn_iter = 250, device = device, warm_start = True, 
#                         unbalanced_lamda = 10.0)
# model.w[0] *= 2
# model.w[-1] *= 2
# model.w = normalize(model.w)

# %% [code]
# output = models.optimize(model_unbal, n_iter = 2_500, tau_final = 0.1, sigma_final = np.sqrt(D), eta_final = 0.5, temp_range = (1, 1), N = M, dim = dim, tloss = model_unbal, print_interval = 50);

# %% [code]
# plt.subplot(1, 2, 1)
plt.plot(output[1])
plt.title("Objective: primal (annealing)")
# plt.subplot(1, 2, 2)
# plt.plot(output2[1])
# plt.title("Objective: primal")

# %% [code]
# plt.subplot(1, 2, 1)
plt.plot(output_null[1])
plt.title("Objective: primal (annealing)")
# plt.subplot(1, 2, 2)
# plt.plot(output2_null[1])
# plt.title("Objective: primal")

# %% [code]
u = np.full(dim, 1); u[1:] = 0
u = u/np.linalg.norm(u)

# %% [code]
plt.subplot(1, 2, 1)
with torch.no_grad():
    plt.scatter(np.kron(np.linspace(0, t_final, T), np.ones(M)), np.dot(model.x.reshape(-1, dim), u), c = np.kron(np.arange(T), np.ones(M)), alpha = 0.25)
    plt.ylim(-2.5, 2.5)
plt.subplot(1, 2, 2)
with torch.no_grad():
    plt.scatter(np.kron(np.linspace(0, t_final, T), np.ones(M)), np.dot(model_null.x.reshape(-1, dim), u), c = np.kron(np.arange(T), np.ones(M)), alpha = 0.25)
    plt.ylim(-2.5, 2.5)

# %% [code]
rownorm = lambda x: x/x.sum(1).reshape(-1, 1)
N_paths = 250
with torch.no_grad():
    paths = bs.sample_paths(None, N = N_paths, coord = True, x_all = model.x.cpu().numpy(), 
                        get_gamma_fn = lambda i : rownorm(model.loss_reg.ot_losses[i].coupling().cpu()), num_couplings = T-1)
    paths_null = bs.sample_paths(None, N = N_paths, coord = True, x_all = model_null.x.cpu().numpy(), 
                        get_gamma_fn = lambda i : rownorm(model_null.loss_reg.ot_losses[i].coupling().cpu()), num_couplings = T-1)

# %% [code]
paths_gt = sim.sample_trajectory(steps_scale = int(sim_steps/sim.T), N = N_paths)
np.mean(paths_gt[:, -1, 0] > 0)

# %% [code]
np.mean(paths[:, -1, 0] > 0)

# %% [code]
np.mean(paths_null[:, -1, 0] > 0)

# %% [code]
fig = plt.figure(figsize = (2*PLT_CELL, 1*PLT_CELL))
plt.subplot(1, 2, 1)
plt.plot(np.linspace(0, t_final, paths_gt.shape[1]), np.dot(paths_gt, u).T, color = 'k', alpha = 0.025);
# plt.scatter(np.linspace(0, t_final, T)[sim.t_idx], np.dot(sim.x, u).T, alpha = 0.25, c = sim.t_idx, marker = ".")
plt.text(0.4, 1, "%0.2f" % np.mean(paths_gt[:, -1, 0] > 0))
plt.text(0.4, -1, "%0.2f" % (1-np.mean(paths_gt[:, -1, 0] > 0)))
plt.ylim(-2, 2)
plt.xlabel("t")
plt.ylabel("$x_0$")
plt.title("Ground truth paths")

plt.subplot(1, 2, 2)
# plt.scatter(np.linspace(0, t_final, T)[sim.t_idx], np.dot(sim.x, u).T, alpha = 0.25, c = sim.t_idx, marker = ".")
im = plt.scatter(np.linspace(0, t_final, T)[sim.t_idx], np.dot(sim.x, u).T, alpha = 0.25, c = R_func(torch.tensor(sim.x)), marker = ".", cmap = "magma", vmin = 0, vmax = 12.5)
plt.ylim(-2, 2)
plt.xlabel("t")
plt.gca().get_yaxis().set_visible(False)
plt.title("Sample")
plt.tight_layout()

fig.subplots_adjust(right=0.85)
cbar_ax = fig.add_axes([0.875, 0.225, 0.025, 0.625])
cb = fig.colorbar(im, cax=cbar_ax)
cb.set_alpha(1)
cb.draw_all()
cbar_ax.set_title("$g$")

plt.savefig("fig3_growth_a.pdf")

# %% [code]
# fig = plt.figure(figsize = (2*PLT_CELL, 1*PLT_CELL))

plt.subplot(1, 2, 1)
plt.plot(np.linspace(0, t_final, paths.shape[1]), np.dot(paths, u).T, color = 'grey', alpha = 0.025);
with torch.no_grad():
    im = plt.scatter(np.kron(np.linspace(0, t_final, T), np.ones(M)), np.dot(model.x.reshape(-1, dim), u), c = np.kron(np.linspace(0, t_final, T), np.ones(M)), alpha = 0.25, marker = ".")
plt.text(0.4, 1, "%0.2f" % np.mean(paths[:, -1, 0] > 0))
plt.text(0.4, -1, "%0.2f" % (1-np.mean(paths[:, -1, 0] > 0)))
plt.ylim(-2, 2)
plt.xlabel("t")
plt.ylabel("$x_0$")
plt.title("MFL + Branching")
plt.subplot(1, 2, 2)
plt.plot(np.linspace(0, t_final, paths_null.shape[1]), np.dot(paths_null, u).T, color = 'grey', alpha = 0.025);
with torch.no_grad():
    plt.scatter(np.kron(np.linspace(0, t_final, T), np.ones(M)), np.dot(model_null.x.reshape(-1, dim), u), c = np.kron(np.linspace(0, t_final, T), np.ones(M)), alpha = 0.25, marker = ".")
plt.text(0.4, 1, "%0.2f" % np.mean(paths_null[:, -1, 0] > 0))
plt.text(0.4, -1, "%0.2f" % (1-np.mean(paths_null[:, -1, 0] > 0)))
plt.ylim(-2, 2)
plt.xlabel("t")
plt.gca().get_yaxis().set_visible(False)
plt.title("MFL")
plt.tight_layout()

fig.subplots_adjust(right=0.85)
cbar_ax = fig.add_axes([0.875, 0.225, 0.025, 0.625])
cb = fig.colorbar(im, cax=cbar_ax)
cb.set_alpha(1)
cb.draw_all()
cbar_ax.set_title("$t$")


plt.savefig("fig3_growth_b.pdf")

# %% [code]
