# Supplementary material
Source: ML conference proceedings conference paper supplement (https://proceedings.neurips.cc/paper_files/paper/2022/hash/6a5181cfe76f67b37a7e1bb19837abdf-Abstract.html)
Supplement: Supplementary file 1 [file 6a5181cfe76f67b37a7e1bb19837abdf-Supplemental-Conference.zip › supplementary/mfl-main/README.md]

# mfl
Trajectory Inference via Mean-field Langevin in Path Space
