# Supplementary material
Source: ML conference proceedings conference paper supplement (https://proceedings.neurips.cc/paper_files/paper/2022/hash/6a5181cfe76f67b37a7e1bb19837abdf-Abstract.html)
Supplement: Supplementary file 1 [file 6a5181cfe76f67b37a7e1bb19837abdf-Supplemental-Conference.zip › supplementary/mfl-main/reprogramming/data_repr.h5ad]

version https://git-lfs.github.com/spec/v1
oid sha256:6258555580bc31d4d2f58865603c3862d6fe223805170d827c607312735b3bf7
size 1317417744
