# Supplementary material
Source: ML conference proceedings conference paper supplement (https://proceedings.neurips.cc/paper_files/paper/2022/hash/6a5181cfe76f67b37a7e1bb19837abdf-Abstract.html)
Supplement: Supplementary file 1 [file 6a5181cfe76f67b37a7e1bb19837abdf-Supplemental-Conference.zip › supplementary/mfl-main/reprogramming/run-gwot.sh]

#!/bin/bash
#SBATCH --time=04:00:00
#SBATCH --account=$ACCOUNT
#SBATCH --cpus-per-task=8
#SBATCH --mem=8192M

ml load python
ml load scipy-stack
source $HOME/langevin_env_repr/bin/activate

N=__N__
SRAND=__SRAND__
LAMDA=__LAMDA__

python main.py --gwot --N $N --srand $SRAND --lamda_gwot $LAMDA --outfile "out_gwot_N_"$N"_srand_"$SRAND"_lamda_"$LAMDA".npy"
